# Supplementary material for: Inorganic carbon fluxes across the vadose zone of planted and unplanted soil mesocosms
Source: Copernicus journal article supplement (doi:10.5194/bg-11-7179-2014), 2014-12-17
Supplement: Supplementary file 1 [file bg-11-7179-2014-supplement.pdf]

Supplement of Biogeosciences, 11, 7179–7192, 2014  
<http://www.biogeosciences.net/11/7179/2014/>  
doi:10.5194/bg-11-7179-2014-supplement  
© Author(s) 2014. CC Attribution 3.0 License.

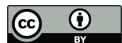

*Supplement of*

## **Inorganic carbon fluxes across the vadose zone of planted and unplanted soil mesocosms**

**E. M. Thaysen et al.**

*Correspondence to:* E. M. Thaysen (eikethaysen@idaea.csic.es)

## Supplementary Information

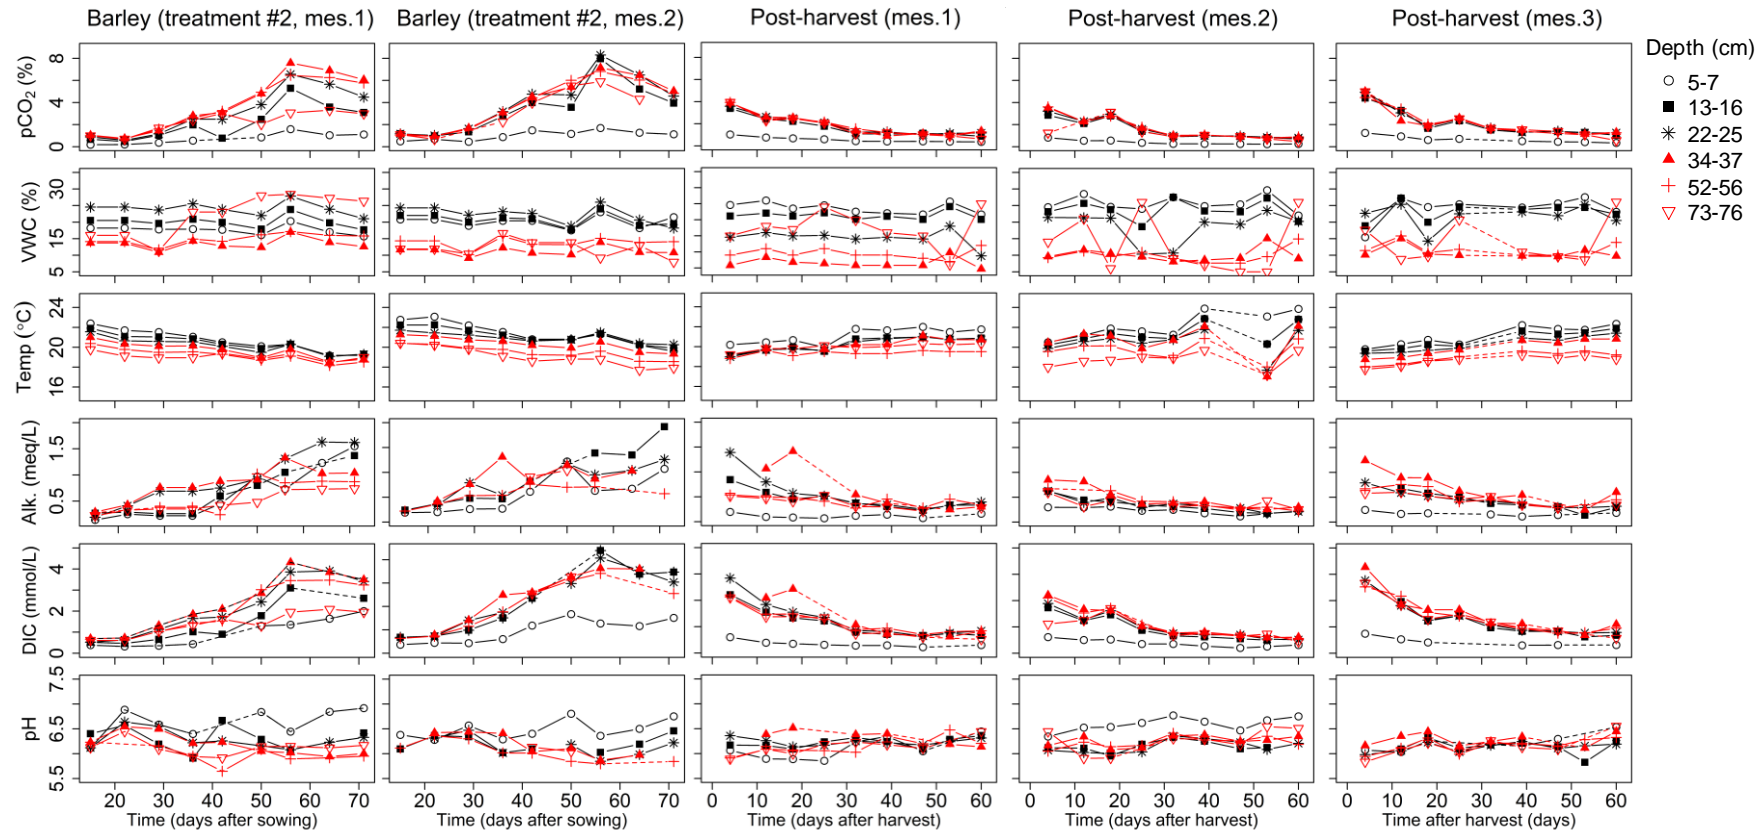

Fig. S1. Time course of pCO<sub>2</sub>, volumetric water content (VWC), temperature, alkalinity (Alk.), DIC and pH on measurement days throughout depth during barley growth (treatment #2) and after harvest. Measurements at 45 and 63 cm depth were excluded for clarification of the figure but followed the same trends as measurements at 13–56 cm. Note the different x axis scale for the subfigures.

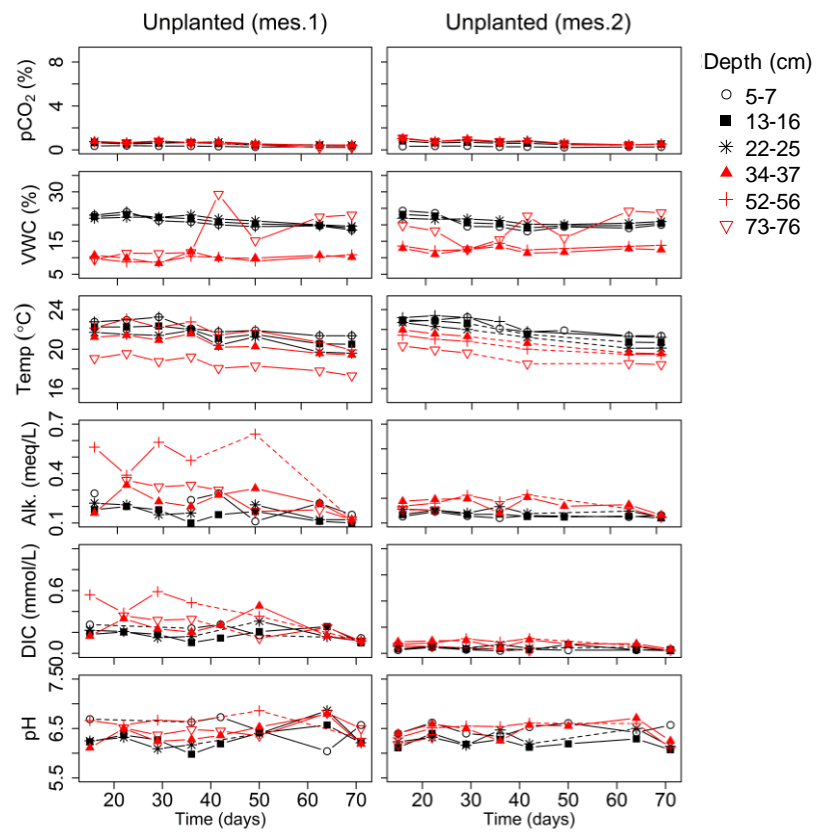

Fig. S1 (continued). Time course of  $p\text{CO}_2$ , volumetric water content (VWC), temperature, alkalinity (Alk.), DIC and pH on measurement days throughout depth in unplanted soil. Measurements at 45 and 63 cm depth were excluded for clarification of the figure but followed the same trends as measurements at 13–56 cm.

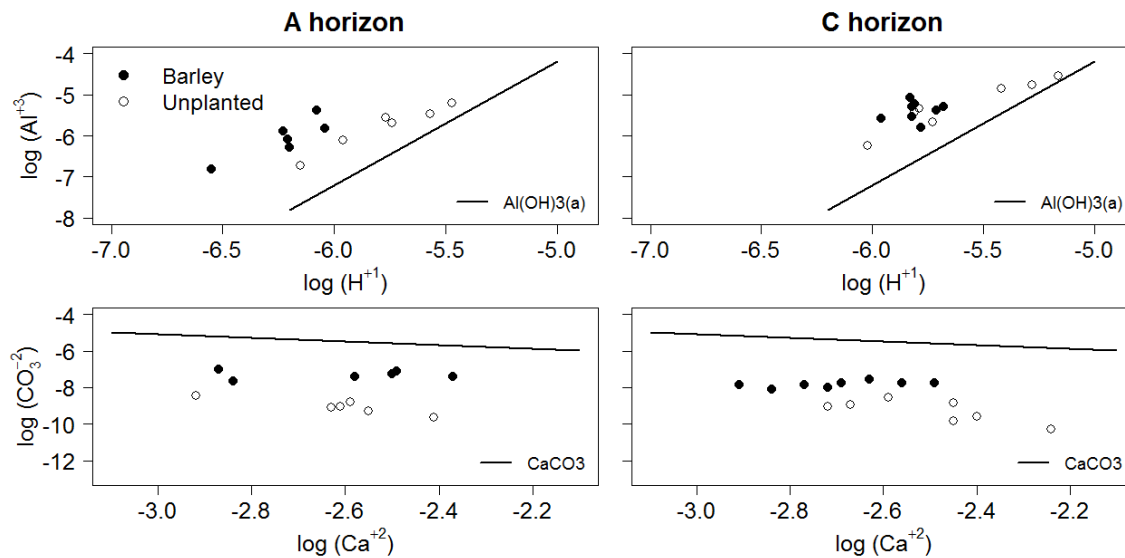

Fig. S2: Log activities of  $\text{Al}^{3+}$  vs.  $\text{H}^+$  as compared to the equilibrium line for  $\text{Al(OH)}_{3(a)}$  and log activities of  $\text{CO}_3^{2-}$  vs.  $\text{Ca}^{2+}$  as compared to the equilibrium line for  $\text{CaCO}_3$  of pore water in A and C horizons on day 71 (series 2 mesocosms only). Samples were analyzed by ICP-MS (Elan6100DRC, Perkin Elmer, CAN), and concentrations were corrected for dilution by the acid added during a previous alkalinity titration. Saturation indices of different minerals in the mesocosms were calculated with PHREEQC software (Parkhurst and Appelo, 2011). Concentrations of the major anions  $\text{NO}_3^-$  and  $\text{SO}_4^{2-}$  were set to 62 and 96  $\text{mg L}^{-1}$ , respectively, as given by the Hoagland solution composition (Hoagland and Amon, 1950). Solutions were charged balanced by adding either  $\text{Li}^+$  or  $\text{Cl}^-$  until electro neutrality.

The pore water was supersaturated for amorphous aluminum hydroxide,  $\text{Al(OH)}_{3(a)}$ , and this indicates the possible precipitation of a gibbsite-type mineral. The soil solutions were subsaturated for calcite,  $\text{CaCO}_3$ , indicating the possible dissolution of lime particles added to the field site. The relations between measurement points and the equilibrium lines were less parallel in the C horizon, indicating less control of either aluminum hydroxide or calcite in the subsoil. Activities of  $\text{H}^+$  were generally lower in the pore water samples from planted soil than in unplanted soil, while activities of  $\text{CO}_3^{2-}$  were slightly elevated.

1

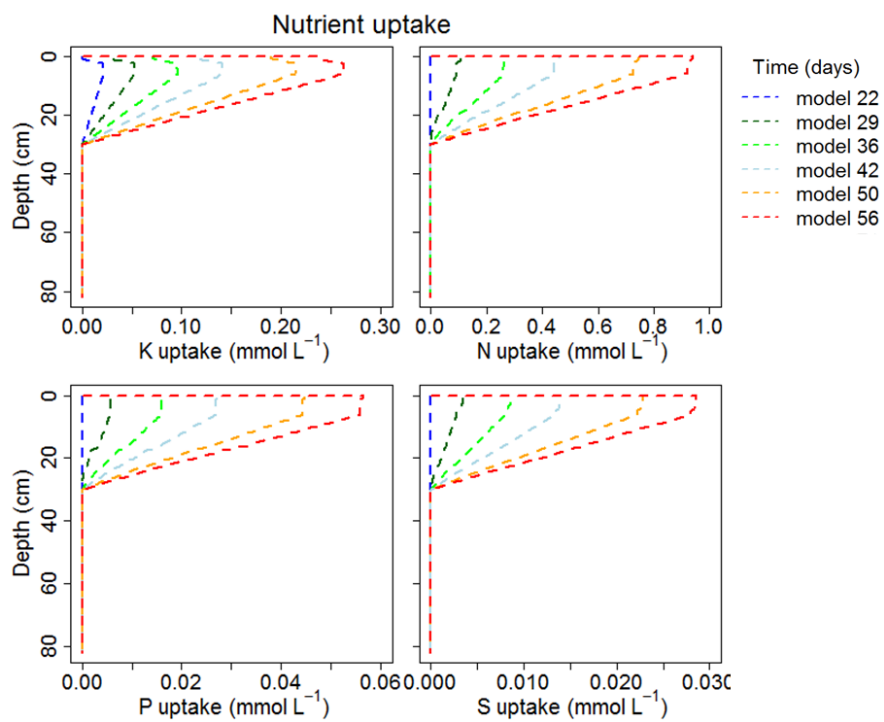

2

3

4 Fig. S3: Simulated nutrient uptake rates of remaining nutrients.

5

6

7

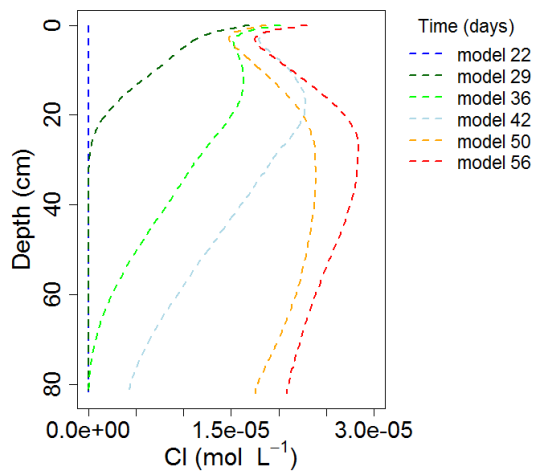

1

2 Fig. S4: Simulated movement of chloride tracer applied at a concentration of  $0.92 \cdot 10^{-5}$  moles  
 3  $L^{-1}$ . Combined action of evaporation and transpiration increased tracer concentration  $\sim 3$  times.  
 4 Evapotranspiration caused a peak in the tracer concentration in the C horizon. Evaporation  
 5 causes steep increases in the tracer concentration at the very top of the mesocosm.

6

7

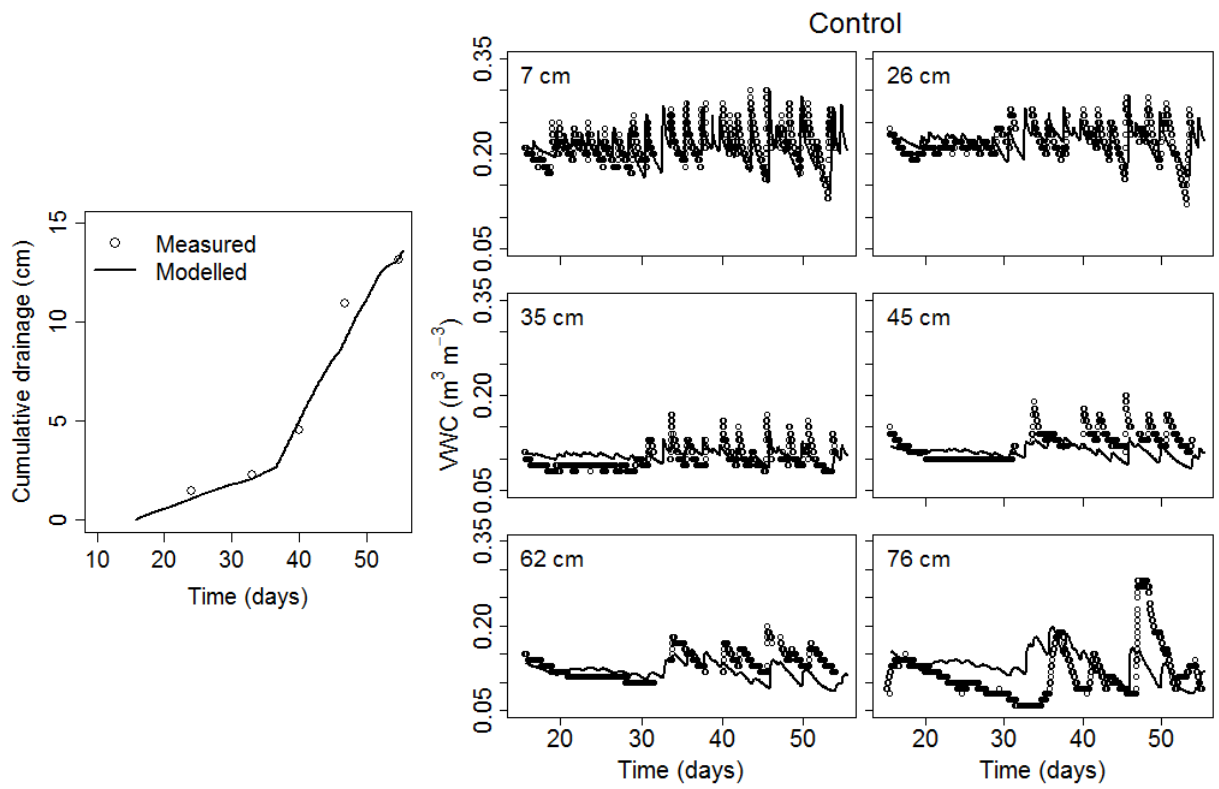

1  
2  
3  
4

Fig. S5: Measured and modeled cumulative drainage and volumetric water content (VWC) in barley mesocosm 5.

## 1 **Text S1: Calculation of theoretical diffusion coefficients**

2 Theoretical bulk diffusion diffusivities,  $D$ , were calculated using the empirical formulas of  
3 Rogers and Nielson (1991) and Andersen (2000) (Eq. 1-3).

$$4 \quad D = D_e \beta \quad (1)$$

$$5 \quad D_e = D_0 \varepsilon \exp(-6m\varepsilon - 6m^{14\varepsilon}) \quad (2)$$

$$6 \quad \beta = \varepsilon_a + L\varepsilon_w + K\rho_b \quad (3)$$

7 where  $D_e$  is the effective diffusion coefficient ( $\text{m}^2 \text{s}^{-1}$ ),  $D_0$  is the diffusion coefficient in air  
8 ( $\text{m}^2 \text{s}^{-1}$ ),  $\varepsilon$  is the total porosity ( $\text{m}^3 \text{m}^{-3}$ ),  $\varepsilon_a$  is the air-filled porosity ( $\text{m}^3 \text{m}^{-3}$ ),  $\varepsilon_w$  is the water-  
9 filled porosity ( $\text{m}^3 \text{m}^{-3}$ ),  $m$  is the water saturation ( $\varepsilon_w / \varepsilon$ ) ( $\text{m}^3 \text{m}^{-3}$ ),  $L$  is the Ostwald coefficient  
10 (equals approx. 0.36 at 10°C and 0.23 at 25°C (Clever, 1979)) and  $K$  is the radon surface  
11 sorption coefficient ( $\text{kg m}^{-3}$ ) (Rogers and Nielson, 1991), and  $\rho_b$  is the soil bulk density ( $\text{kg}$   
12  $\text{m}^{-3}$ ).

13 In the calculations  $\varepsilon_w$  was set to 0.2 and 0.1 ( $\text{m}^3 \text{m}^{-3}$ ) for the A and C horizon, respectively,  $\rho_b$   
14 was 1.45 and 1.53  $\text{kg m}^{-3}$  for the A and C horizon, respectively, and  $K$  was assumed to be 0.  $L$   
15 was set to 0.26. Total porosities of the A and C horizon were 0.45 and 0.43, respectively.

16



1 Table S1: Parameters used in the modeling of soil CO<sub>2</sub> fluxes. DW= dry weight.

| Symbol        | Meaning                                                      | Value                                                                    | Calculation/Source                                                                                                                                                                            |
|---------------|--------------------------------------------------------------|--------------------------------------------------------------------------|-----------------------------------------------------------------------------------------------------------------------------------------------------------------------------------------------|
| $R_{init}$    | Initial root mass                                            | 2.0 g DW                                                                 | Calculated from the measured root mass (Table 3) assuming linear root growth                                                                                                                  |
| $r$           | Root growth rate                                             | $2.4 \cdot 10^{-6} \text{ g s}^{-1}$                                     | Calculated from the measured root mass 65.5 days after germination (Table 3) and assuming linear root growth                                                                                  |
| $RMI$         | Root mass index                                              |                                                                          | Calculated by $R_{init} + (r \cdot \text{time})$                                                                                                                                              |
| $\gamma_{so}$ | Optimum microbial respiration                                | $0.8 \mu\text{mol m}^{-2} \text{ s}^{-1} \text{ g}_{\text{DWroot}}^{-1}$ | Average "optimum" respiration in planted mesocosms divided by the root mass 65.5 days after germination (Table 3) and by a factor 2 for equal division between root and microbial respiration |
| $\gamma_{po}$ | Optimum root respiration                                     | $0.8 \mu\text{mol m}^{-2} \text{ s}^{-1} \text{ g}_{\text{DWroot}}^{-1}$ |                                                                                                                                                                                               |
| $a$           | Scaling factor for depth dependency of microbial respiration | $0.0015 \text{ m}^{-1}$                                                  |                                                                                                                                                                                               |
| -             | Boundary layer height                                        | 0.02 m                                                                   |                                                                                                                                                                                               |

2

3

## 1 **References**

- 2 Clever, H. L.: Solubility data series. Krypton, xenon and radon-gas solubilities, Pergamon  
3 Press, 1979.
- 4 Dunlop, J.: The kinetic uptake of calcium by roots, *Planta*, 112, 159-167, 1973.
- 5 Hoagland, D. R., and Amon, D. I.: The water-culture method for growing plants without soil,  
6 College of Agriculture, University of California, Berkley, 1950.
- 7 Marschner, H.: Mineral nutrition of higher plants, Second Edition ed., Academic Press  
8 Limited, London, 1995.
- 9 Nielsen, N. E.: Forløbet af rodudvikling, næringsstofoptagelse og stofproduktion hos byg,  
10 dyrket på frugtbar morænelerjord, Royal Veterinary and Agricultural University,  
11 Copenhagen, DK, 1982.
- 12 Nissen, P.: Multiphasic uptake in plants II. Mineral cations, chloride, and boric acid, *Physiol*  
13 *Plantarum*, 29, 298-354, 1973a.
- 14 Nissen, P.: Multiphasic uptake in plants I. Phosphate and sulphate, *Plant Physiol*, 28, 304-316,  
15 1973b.
- 16 Parkhurst, D., and Appelo, C. A. J.: PHREEQC (Version 3)- A computer program for  
17 speciation, batch-reaction, one-dimensional transport, and inverse geochemical calculations,  
18 U.S. Geological Survey, Water Resources Division, Denver, Colorado, USA, 2011.
- 19 Rao, K. P., and Rains, D. W.: Nitrate absorption by barley, *Plant Physiol*, 57, 55-58, 1976.
- 20 Rogers, V. C., and Nielson, K. K.: Correlations for predicting air permeabilities and  $^{222}\text{Rn}$   
21 diffusion coefficients of soils, *Health Phys*, 61, 225-230, 1991.
- 22
- 23
- 24
